# Supplementary material
Source: publisher site journal article supplement (https://www.dovepress.com/article/235646)
Supplement: Supplementary file 1 [file get_supplementary_file.php]

**Table S1.** The regression equations, correlation coefficient (*r*), linear ranges and LLOQs for the determination of seven analytes in rat plasma.

| Analytes           | Linear regression equations                         | <i>r</i> | Linear range (ng/mL) | LLOQ (ng/mL) |
|--------------------|-----------------------------------------------------|----------|----------------------|--------------|
| Gallic acid        | $Y = 0.607 \times 10^{-1} X + 1.004 \times 10^{-1}$ | 0.996 6  | 0.1-50.0             | 0.1          |
| Danshensu          | $Y = 3.499 \times 10^{-1} X - 9.966 \times 10^{-3}$ | 0.996 3  | 0.5-250.0            | 0.5          |
| Rosmarinic acid    | $Y = 2.090 X + 5.049 \times 10^{-2}$                | 0.997 1  | 0.1-50.0             | 0.1          |
| Salvianolic acid A | $Y = 2.197 \times 10^{-1} X + 1.650 \times 10^{-2}$ | 0.996 9  | 0.1-50.0             | 0.1          |
| Aloe emodin        | $Y = 2.793 \times 10^{-1} X + 4.519 \times 10^{-3}$ | 0.997 2  | 1.0-500.0            | 1.0          |
| Rhein              | $Y = 2.181 \times 10^{-1} X - 1.274 \times 10^{-1}$ | 0.997 6  | 1.0-500.0            | 1.0          |
| Emodin             | $Y = 1.218 \times 10^{-1} X + 6.569 \times 10^{-3}$ | 0.998 0  | 0.1-50.0             | 0.1          |

**Table S2.** Precision and accuracy for seven analytes in rat plasma (n=18, 6 replicates per day for 3 days).

| Analytes           | Nominal concentration (ng/mL) | Intra-day                      |                   |                 | Inter-day                      |                   |                 |
|--------------------|-------------------------------|--------------------------------|-------------------|-----------------|--------------------------------|-------------------|-----------------|
|                    |                               | Measured concentration (ng/mL) | Precision (% RSD) | Accuracy (% RE) | Measured concentration (ng/mL) | Precision (% RSD) | Accuracy (% RE) |
| Gallic acid        | 0.1                           | 0.09 ± 0.00                    | 4.36              | -5.80           | 0.10 ± 0.01                    | 9.85              | -3.74           |
|                    | 0.2                           | 0.21 ± 0.01                    | 6.27              | 7.45            | 0.22 ± 0.01                    | 6.68              | 8.69            |
|                    | 2.5                           | 2.35 ± 0.12                    | 5.30              | -6.11           | 2.36 ± 0.10                    | 4.33              | -5.78           |
|                    | 40.0                          | 40.62 ± 2.18                   | 5.25              | 4.05            | 41.64 ± 1.73                   | 4.15              | 4.09            |
| Danshensu          | 0.5                           | 0.50 ± 0.01                    | 2.79              | 0.65            | 0.50 ± 0.01                    | 3.00              | -0.27           |
|                    | 1.0                           | 1.05 ± 0.05                    | 4.74              | 5.29            | 1.04 ± 0.04                    | 4.09              | 4.19            |
|                    | 12.5                          | 11.45 ± 0.35                   | 3.06              | -8.37           | 11.63 ± 0.51                   | 4.41              | -6.98           |
|                    | 200.0                         | 218.80 ± 8.37                  | 3.82              | 9.40            | 215.30 ± 9.36                  | 4.35              | 7.65            |
| Rosmarinic acid    | 0.1                           | 0.10 ± 0.01                    | 3.57              | -0.43           | 0.10 ± 0.00                    | 3.57              | 0.92            |
|                    | 0.2                           | 0.21 ± 0.00                    | 1.40              | 6.67            | 0.21 ± 0.01                    | 2.69              | 5.75            |
|                    | 2.5                           | 2.35 ± 0.10                    | 4.21              | -5.98           | 2.38 ± 0.10                    | 4.10              | -4.70           |
|                    | 40.0                          | 43.98 ± 1.74                   | 3.95              | 9.94            | 43.80 ± 1.50                   | 3.42              | 9.51            |
| Salvianolic acid A | 0.1                           | 0.10 ± 0.01                    | 5.21              | -3.10           | 0.10 ± 0.01                    | 6.51              | -2.04           |
|                    | 0.2                           | 0.21 ± 0.01                    | 6.54              | 7.23            | 0.21 ± 0.01                    | 5.65              | 6.74            |
|                    | 2.5                           | 2.40 ± 0.08                    | 3.29              | -3.90           | 2.41 ± 0.09                    | 3.55              | -3.74           |
|                    | 40.0                          | 41.93 ± 1.35                   | 3.23              | 4.83            | 42.67 ± 1.42                   | 3.32              | 6.67            |
| Aloe emodin        | 1.0                           | 0.95 ± 0.04                    | 4.50              | -4.59           | 0.96 ± 0.04                    | 3.84              | -3.87           |
|                    | 2.0                           | 2.16 ± 0.10                    | 4.77              | 8.01            | 2.15 ± 0.08                    | 3.73              | 7.36            |
|                    | 25.0                          | 23.44 ± 0.42                   | 1.78              | -6.23           | 23.81 ± 1.00                   | 4.19              | -4.75           |

|        |       |                |      |       |                |      |       |
|--------|-------|----------------|------|-------|----------------|------|-------|
|        | 400.0 | 431.80 ± 5.33  | 1.24 | 7.95  | 423.81 ± 14.15 | 3.34 | 5.95  |
|        | 1.0   | 1.00 ± 0.02    | 1.54 | -0.31 | 1.00 ± 0.01    | 1.16 | -0.16 |
| Rhein  | 2.0   | 2.04 ± 0.07    | 3.28 | 2.20  | 2.05 ± 0.05    | 2.59 | 2.32  |
|        | 25.0  | 24.78 ± 1.12   | 4.51 | -0.88 | 24.63 ± 0.85   | 3.43 | -1.47 |
|        | 400.0 | 432.01 ± 11.90 | 2.75 | 8.00  | 428.28 ± 16.37 | 3.82 | 7.07  |
|        | 0.1   | 0.10 ± 0.01    | 6.68 | -0.98 | 0.10 ± 0.01    | 6.63 | -0.02 |
| Emodin | 0.2   | 0.20 ± 0.01    | 3.15 | 2.41  | 0.20 ± 0.01    | 4.08 | -0.29 |
|        | 2.5   | 2.54 ± 0.12    | 4.56 | 1.43  | 5.52 ± 0.12    | 4.60 | 0.61  |
|        | 40.0  | 40.67 ± 1.65   | 4.0  | 1.67  | 40.83 ± 1.26   | 3.09 | 2.08  |

**Table S3.** Extraction recovery and matrix effect for seven analytes and IS in rat plasma (n=6).

| Analytes           | Spiked concentration (ng/mL) | Extraction Recovery |         | Matrix Effect |         |
|--------------------|------------------------------|---------------------|---------|---------------|---------|
|                    |                              | Mean (%)            | RSD (%) | Mean (%)      | RSD (%) |
| Gallic acid        | 0.2                          | 88.71               | 4.62    | 94.84         | 5.62    |
|                    | 2.5                          | 88.70               | 4.95    | 101.78        | 6.20    |
|                    | 40.0                         | 81.71               | 6.77    | 100.33        | 4.73    |
| Danshensu          | 1.0                          | 87.08               | 8.34    | 97.81         | 6.11    |
|                    | 12.5                         | 81.38               | 4.14    | 99.93         | 6.80    |
|                    | 200.0                        | 87.10               | 6.41    | 96.70         | 3.99    |
| Rosmarinic acid    | 0.2                          | 82.37               | 8.21    | 99.73         | 5.48    |
|                    | 2.5                          | 87.83               | 6.60    | 100.83        | 3.92    |
|                    | 40.0                         | 89.30               | 6.30    | 104.43        | 5.19    |
| Salvianolic acid A | 0.2                          | 90.82               | 6.14    | 97.10         | 3.56    |
|                    | 2.5                          | 87.35               | 5.31    | 102.38        | 5.74    |
|                    | 40.0                         | 89.50               | 8.58    | 102.95        | 4.16    |
| Aloe emodin        | 2.0                          | 85.88               | 5.69    | 101.35        | 6.69    |
|                    | 25.0                         | 84.49               | 5.58    | 101.62        | 8.26    |
|                    | 400.0                        | 85.38               | 4.57    | 96.23         | 6.11    |
| Rhein              | 2.0                          | 82.93               | 4.05    | 94.85         | 5.01    |
|                    | 25.0                         | 88.22               | 4.41    | 100.97        | 5.83    |
|                    | 400.0                        | 85.86               | 5.34    | 99.81         | 5.18    |
| Emodin             | 0.2                          | 88.98               | 8.10    | 100.26        | 3.96    |
|                    | 2.5                          | 87.36               | 5.94    | 97.81         | 7.54    |
|                    | 40.0                         | 87.00               | 7.75    | 95.27         | 4.42    |
| Carbamazepine      | 100.0                        | 83.94               | 6.13    | 100.44        | 7.36    |



**Table S4.** Stability of the seven analytes in rat plasma under different storage conditions (n=6).

| Analytes           | Spiked concentration (ng/mL) | Room temperature 4 h |         | Auto-sampler 24h |         | Three freeze-thraw cycles |         | Stored at 4°C for 24h |         | Stored at -20 °C for 14 days |         |
|--------------------|------------------------------|----------------------|---------|------------------|---------|---------------------------|---------|-----------------------|---------|------------------------------|---------|
|                    |                              | RE (%)               | RSD (%) | RE (%)           | RSD (%) | RE (%)                    | RSD (%) | RE (%)                | RSD (%) | RE (%)                       | RSD (%) |
| Gallic acid        | 0.2                          | 1.83                 | 5.68    | 7.16             | 3.33    | 4.78                      | 8.92    | 6.71                  | 9.40    | 8.09                         | 4.68    |
|                    | 2.5                          | -4.96                | 3.00    | -6.94            | 2.21    | -4.89                     | 2.89    | -4.02                 | 4.06    | -3.88                        | 4.89    |
|                    | 40.0                         | 4.88                 | 2.31    | 5.58             | 2.20    | 3.73                      | 3.55    | 0.24                  | 2.65    | 0.58                         | 3.61    |
| Danshensu          | 1.0                          | 6.01                 | 3.70    | 5.25             | 5.59    | 3.75                      | 4.49    | 2.50                  | 2.36    | 4.06                         | 4.13    |
|                    | 12.5                         | -6.15                | 3.61    | -5.74            | 3.83    | -5.97                     | 3.39    | -6.11                 | 2.96    | -6.23                        | 2.83    |
|                    | 200.0                        | 5.27                 | 3.17    | 8.18             | 3.26    | 9.43                      | 3.40    | 6.56                  | 3.79    | 4.01                         | 2.69    |
| Rosmarinic acid    | 0.2                          | 5.02                 | 5.28    | 6.42             | 4.75    | 7.64                      | 3.65    | 6.46                  | 4.35    | 5.70                         | 3.33    |
|                    | 2.5                          | -5.17                | 1.84    | -3.12            | 1.84    | -2.50                     | 2.12    | -3.52                 | 2.30    | -4.83                        | 2.34    |
|                    | 40.0                         | 8.09                 | 3.02    | 8.91             | 2.52    | 9.07                      | 2.34    | 6.62                  | 2.59    | 8.15                         | 4.28    |
| Salvianolic acid A | 0.2                          | 4.69                 | 7.27    | 4.82             | 5.48    | 4.11                      | 4.24    | 6.23                  | 4.35    | 4.81                         | 4.97    |
|                    | 2.5                          | -6.00                | 4.19    | -4.20            | 4.93    | -5.51                     | 4.78    | -6.38                 | 4.90    | -4.68                        | 5.86    |
|                    | 40.0                         | 5.83                 | 3.72    | 5.35             | 3.16    | 5.05                      | 3.85    | 4.09                  | 3.65    | 6.71                         | 4.10    |
| Aloe emodin        | 2.0                          | 7.61                 | 3.62    | 9.85             | 2.15    | 9.90                      | 2.71    | 9.48                  | 3.63    | 8.43                         | 3.38    |
|                    | 25.0                         | -4.09                | 3.65    | -5.88            | 4.31    | -5.78                     | 3.79    | -3.62                 | 3.83    | -2.82                        | 3.46    |
|                    | 400.0                        | 3.96                 | 5.11    | 7.06             | 3.43    | 9.53                      | 3.02    | 6.32                  | 4.46    | 6.04                         | 4.80    |
| Rhein              | 2.0                          | 1.69                 | 1.13    | 3.29             | 2.49    | 3.69                      | 2.38    | 2.47                  | 2.24    | 1.39                         | 2.48    |
|                    | 25.0                         | -4.71                | 2.85    | -3.40            | 4.88    | -1.86                     | 4.41    | -0.64                 | 3.13    | 0.16                         | 2.62    |

---

|        |       |      |      |      |      |       |      |       |      |       |      |
|--------|-------|------|------|------|------|-------|------|-------|------|-------|------|
|        | 400.0 | 2.12 | 4.67 | 4.89 | 4.66 | 7.09  | 4.37 | 5.25  | 3.85 | 4.16  | 1.80 |
|        | 0.2   | 2.17 | 3.64 | 0.38 | 4.65 | 1.64  | 4.57 | -0.52 | 5.69 | -0.06 | 6.62 |
| Emodin | 2.5   | 0.60 | 1.98 | 0.29 | 4.41 | -0.05 | 4.61 | -0.55 | 3.88 | 2.73  | 2.07 |
|        | 40.0  | 6.20 | 2.81 | 4.65 | 3.53 | 5.05  | 4.01 | 6.41  | 2.84 | 3.30  | 2.30 |

---

**Table S5.** The MS information of the meatbolins derived from the seven prototypal components

| Metabolin | Formula                                       | RT(min) | ES/expected(m/z) | ES/measured(m/z) | Delta (ppm) | Fragment Ion(m/z)                                                                                                                                                                                                                                                                                                                                                                                                                         |
|-----------|-----------------------------------------------|---------|------------------|------------------|-------------|-------------------------------------------------------------------------------------------------------------------------------------------------------------------------------------------------------------------------------------------------------------------------------------------------------------------------------------------------------------------------------------------------------------------------------------------|
| M1-1      | C <sub>7</sub> H <sub>4</sub> O               | 11.43   | 105.03349        | 105.03353        | -0.368      | 105.03[M+H] <sup>+</sup> ,81.03[M+H-2C] <sup>+</sup> ,77.04[M+H-CO] <sup>+</sup> ,53.04[M+H-CO-2C] <sup>+</sup>                                                                                                                                                                                                                                                                                                                           |
| M1-2      | C <sub>8</sub> H <sub>4</sub> O <sub>3</sub>  | 31.7    | 149.02332        | 149.02296        | -2.419      | 149.02[M+H] <sup>+</sup> ,121.03[M+H-CO] <sup>+</sup> ,93.03[M+H-CO-CO] <sup>+</sup> ,65.04[M+H-CO-CO-CO] <sup>+</sup>                                                                                                                                                                                                                                                                                                                    |
| M1-3      | C <sub>9</sub> H <sub>9</sub> NO <sub>3</sub> | 11.43   | 180.06551        | 180.06525        | -1.498      | 180.07[M+H] <sup>+</sup> ,105.03[M+H-C <sub>2</sub> H <sub>5</sub> NO <sub>2</sub> ] <sup>+</sup> ,95.05[M+H-C <sub>3</sub> H <sub>3</sub> NO <sub>2</sub> ] <sup>+</sup> ,81.03[M+H-C <sub>3</sub> H <sub>3</sub> NO <sub>2</sub> -CH <sub>2</sub> ] <sup>+</sup> ,77.04[M+H-C <sub>2</sub> H <sub>5</sub> NO <sub>2</sub> -CO] <sup>+</sup> ,53.04[M+H-C <sub>3</sub> H <sub>3</sub> NO <sub>2</sub> -CH <sub>2</sub> -CO] <sup>+</sup> |
| M1-4      | C <sub>9</sub> H <sub>8</sub> O <sub>3</sub>  | 2.5     | 165.05462        | 165.05429        | -2.003      | 165.05[M+H] <sup>+</sup> ,147.04[M+H-H <sub>2</sub> O] <sup>+</sup> ,123.04[M+H-CO-CH <sub>2</sub> ] <sup>+</sup> ,119.05[M+H-H <sub>2</sub> O-CO] <sup>+</sup> ,103.05[M+H-H <sub>2</sub> O-CO <sub>2</sub> ] <sup>+</sup> ,95.05[M+H-CO-CH <sub>2</sub> -CO] <sup>+</sup> ,91.05[M+H-H <sub>2</sub> O-CO-CO] <sup>+</sup> ,77.04[M+H-CO-CH <sub>2</sub> -CO-H <sub>2</sub> O] <sup>+</sup>                                              |
| M2-1      | C <sub>9</sub> H <sub>8</sub> O <sub>2</sub>  | 4.13    | 149.05970        | 149.05943        | -1.852      | 149.06[M+H] <sup>+</sup> ,131.05[M+H-H <sub>2</sub> O] <sup>+</sup> ,121.06[M+H-C <sub>2</sub> H <sub>4</sub> ] <sup>+</sup> ,107.05[M+H-H <sub>2</sub> O-2C] <sup>+</sup> ,103.05[M+H-H <sub>2</sub> O-CO] <sup>+</sup> ,95.05[M+H-H <sub>2</sub> O-3C] <sup>+</sup> ,79.05[M+H-H <sub>2</sub> O-2C-CO] <sup>+</sup> ,65.04[M+H-H <sub>2</sub> O-2C-CO-CH <sub>2</sub> ] <sup>+</sup>                                                    |
| M2-2      | C <sub>9</sub> H <sub>6</sub> O <sub>3</sub>  | 26.65   | 163.03897        | 163.03870        | -1.660      | 163.04[M+H] <sup>+</sup> ,135.04[M+H-CO] <sup>+</sup> ,133.03[M+H-CH <sub>2</sub> O] <sup>+</sup> ,105.03[M+H-CH <sub>2</sub> O-CO] <sup>+</sup> ,92.03[M+H-CH <sub>2</sub> O-CO-CH] <sup>+</sup> ,79.05[M+H-CO-CO-CO] <sup>+</sup> ,53.04[M+H-CO-CO-CO-C <sub>2</sub> H <sub>2</sub> ] <sup>+</sup>                                                                                                                                      |
| M2-4      | C <sub>10</sub> H <sub>8</sub> O <sub>4</sub> | 21.14   | 193.04953        | 193.04929        | -1.271      | 193.05[M+H] <sup>+</sup> ,149.02[M+H-CH <sub>3</sub> CHO] <sup>+</sup> ,139.04[M+H-CO-C <sub>2</sub> H <sub>2</sub> ] <sup>+</sup> ,121.03[M+H-CH <sub>3</sub> CHO-CO] <sup>+</sup> ,65.04[M+H-CH <sub>3</sub> CHO-CO-CO-CO] <sup>+</sup>                                                                                                                                                                                                 |



|      |                                                               |       |           |           |        |                                                                                                                                                                                                                                                                                                                                                                                                                                                                                                                                                                                                                                                                              |
|------|---------------------------------------------------------------|-------|-----------|-----------|--------|------------------------------------------------------------------------------------------------------------------------------------------------------------------------------------------------------------------------------------------------------------------------------------------------------------------------------------------------------------------------------------------------------------------------------------------------------------------------------------------------------------------------------------------------------------------------------------------------------------------------------------------------------------------------------|
| M2-5 | C <sub>11</sub> H <sub>15</sub> N O <sub>4</sub>              | 7.17  | 226.10738 | 226.10692 | -2.054 | 226.10[M+H] <sup>+</sup> ,208.09[M+H-H <sub>2</sub> O] <sup>+</sup> ,190.08[M+H-H <sub>2</sub> O-H <sub>2</sub> O] <sup>+</sup> ,166.08[M+H-H <sub>2</sub> O-H <sub>2</sub> O-2C] <sup>+</sup> ,138.09[M+H-H <sub>2</sub> O-H <sub>2</sub> O-2C-CO] <sup>+</sup>                                                                                                                                                                                                                                                                                                                                                                                                             |
| M2-6 | C <sub>14</sub> H <sub>18</sub> N <sub>2</sub> O <sub>5</sub> | 10.61 | 295.12884 | 295.12823 | -2.095 | 295.13[M+H] <sup>+</sup> ,278.10[M+H-NH <sub>3</sub> ] <sup>+</sup> ,232.10[M+H-NH <sub>3</sub> -C H <sub>2</sub> O <sub>2</sub> ] <sup>+</sup> ,166.09[M+H-C <sub>5</sub> H <sub>7</sub> NO <sub>3</sub> ] <sup>+</sup> ,130.05[M+H-NH <sub>3</sub> -C <sub>9</sub> H <sub>8</sub> O <sub>2</sub> ] <sup>+</sup> ,120.08[M+H-C <sub>5</sub> H <sub>7</sub> NO <sub>3</sub> -CH <sub>2</sub> O <sub>2</sub> ] <sup>+</sup> ,103.05[M+H-C <sub>5</sub> H <sub>7</sub> NO <sub>3</sub> -CH <sub>2</sub> O <sub>2</sub> -NH <sub>3</sub> ] <sup>+</sup> ,84.04[M+H-NH <sub>3</sub> -C <sub>9</sub> H <sub>8</sub> O <sub>2</sub> -CH <sub>2</sub> O <sub>2</sub> ] <sup>+</sup> |
| M2-7 | C <sub>14</sub> H <sub>20</sub> N <sub>2</sub> O <sub>5</sub> | 6.45  | 297.14449 | 297.14383 | -2.249 | 297.14[M+H] <sup>+</sup> ,279.13[M+H-H <sub>2</sub> O] <sup>+</sup> ,255.13[M+H-H <sub>2</sub> O-2C] <sup>+</sup> ,210.11[M+H-H <sub>2</sub> O-2C-CH <sub>3</sub> ON] <sup>+</sup> ,192.10[M+H-H <sub>2</sub> O-2C-CH <sub>3</sub> ON-H <sub>2</sub> O] <sup>+</sup> ,126.05[M+H-H <sub>2</sub> O-2C-CH <sub>3</sub> ON-H <sub>2</sub> O-C <sub>5</sub> H <sub>6</sub> ] <sup>+</sup>                                                                                                                                                                                                                                                                                        |
| M3-3 | C <sub>9</sub> H <sub>8</sub> O <sub>3</sub>                  | 2.58  | 165.05462 | 165.05444 | -1.095 | 165.05[M+H] <sup>+</sup> ,147.0434[M+H-H <sub>2</sub> O] <sup>+</sup> ,123.0437[M+H-C O-CH <sub>2</sub> ] <sup>+</sup> ,119.0489[M+H-H <sub>2</sub> O-CO] <sup>+</sup> ,103.0541[M+H-H <sub>2</sub> O-CO <sub>2</sub> ] <sup>+</sup> ,95.0488[M+H-CO-CH <sub>2</sub> -CO] <sup>+</sup> ,91.0543[M+H-H <sub>2</sub> O-CO-CO] <sup>+</sup> ,77.0385[M+H-CO-CH <sub>2</sub> -CO-H <sub>2</sub> O] <sup>+</sup>                                                                                                                                                                                                                                                                  |
| M5-1 | C <sub>15</sub> H <sub>14</sub> O <sub>3</sub>                | 23.56 | 243.10157 | 243.1012  | -1.649 | 243.10[M+H] <sup>+</sup> ,123.04[M+H-C <sub>8</sub> H <sub>8</sub> O] <sup>+</sup> ,107.05[M+H-C <sub>8</sub> H <sub>8</sub> O <sub>2</sub> ] <sup>+</sup> ,95.05[M+H-C <sub>8</sub> H <sub>8</sub> O-CO] <sup>+</sup> ,79.05[M+H-C <sub>8</sub> H <sub>8</sub> O-CO <sub>2</sub> ] <sup>+</sup>                                                                                                                                                                                                                                                                                                                                                                             |
| M5-2 | C <sub>21</sub> H <sub>22</sub> O <sub>8</sub>                | 29.01 | 403.13874 | 403.1376  | -2.838 | 403.14[M+H] <sup>+</sup> ,373.09[M+H-CH <sub>3</sub> -CH <sub>3</sub> ] <sup>+</sup> ,327.09[M+H-C H <sub>3</sub> -CH <sub>3</sub> -CO-H <sub>2</sub> O] <sup>+</sup>                                                                                                                                                                                                                                                                                                                                                                                                                                                                                                        |
| M6-2 | C <sub>15</sub> H <sub>10</sub> O <sub>5</sub>                | 25.72 | 271.06009 | 271.0593  | -2.840 | 271.06[M+H] <sup>+</sup> ,225.06[M+H-CO <sub>2</sub> -H <sub>2</sub> O] <sup>+</sup> ,135.04[M+H-C <sub>7</sub> H <sub>4</sub> O <sub>3</sub> ] <sup>+</sup>                                                                                                                                                                                                                                                                                                                                                                                                                                                                                                                 |

Note: Some metabolites may be derived from different prototypal components, M2-3 and M1-4 were identified as the same metabolites. Similarly, M3-1 with M2-1; M3-2 with M2-2; M3-4 with M2-4; M3-5 with M2-5; M3-6 with M2-6; M3-7 with M2-7; M4-1 with M2-2; M4-2 with M1-4; M4-3 with M2-4; M4-4 with M2-5; M4-5 with M2-6; M4-6 with M2-7; M6-1 with M5-1; M7-1 with M5-1; M7-2 with M5-2, were also the same metabolites.
